# Supplementary material
Source: PubMed Central journal article supplement (PMC548335)

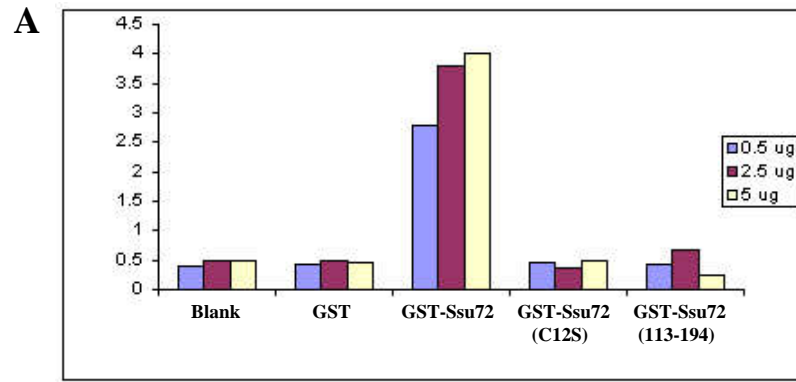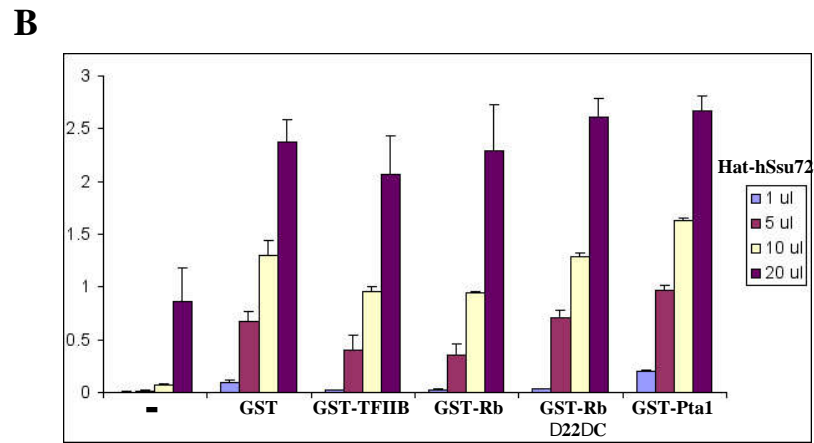

Supplement: nar_33_2_464__1.pdf [file nar_33_2_464__1.pdf]

**A**Three successive transfections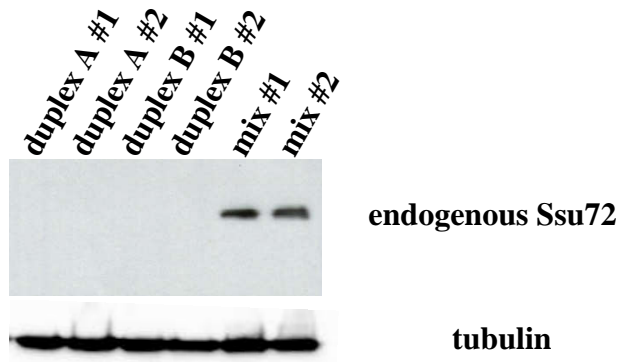**B**Two successive transfections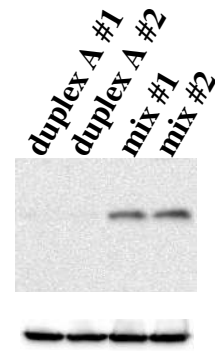**C**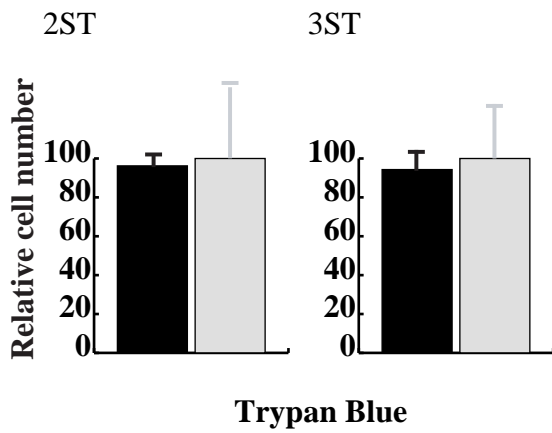**D**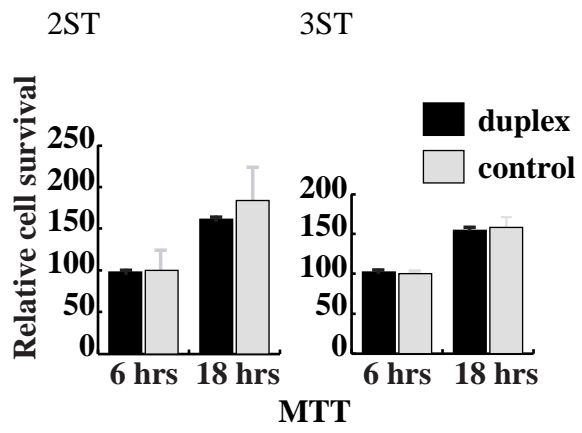

Supplement: nar_33_2_464__2.pdf [file nar_33_2_464__2.pdf]

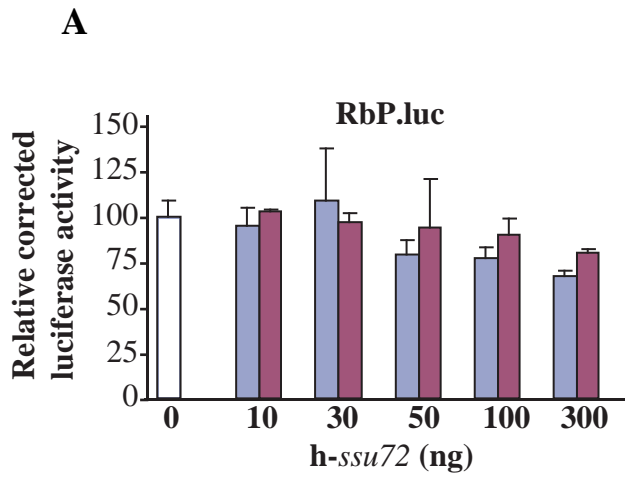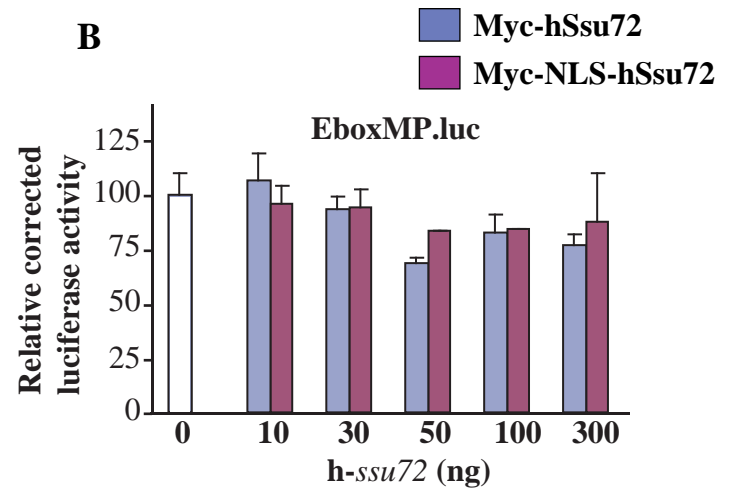

Supplement: nar_33_2_464__3.pdf [file nar_33_2_464__3.pdf]
